# Supplementary material
Source: PubMed Central journal article supplement (PMC4574245)

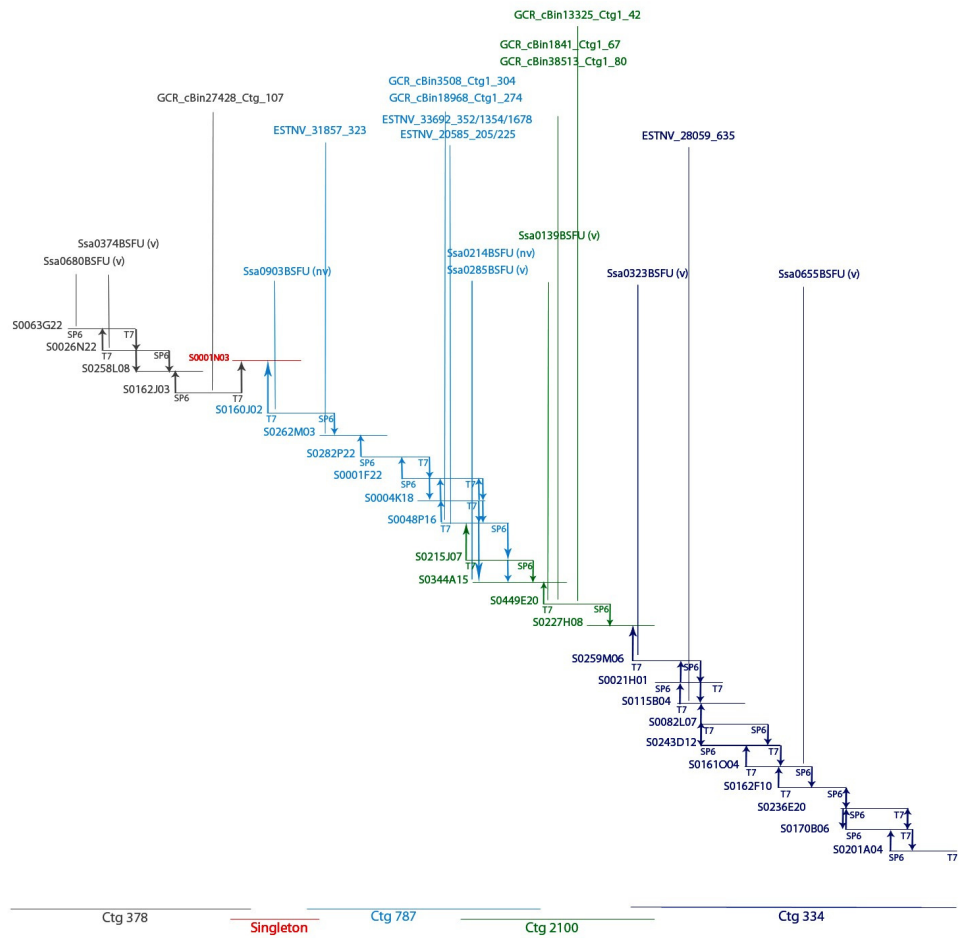

Supplement: 10.1534_115.175406_genetics.115.175406-2.pdf [file 10.1534_115.175406_genetics.115.175406-2.pdf]
